# Supplementary material
Source: PubMed Central journal article supplement (PMC4226373)

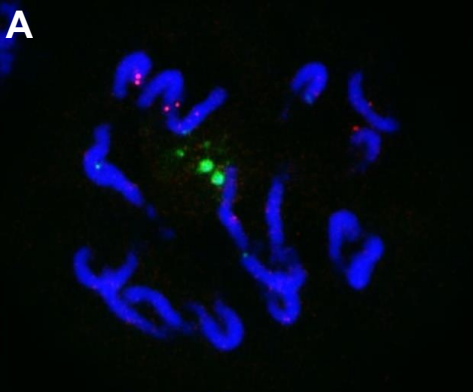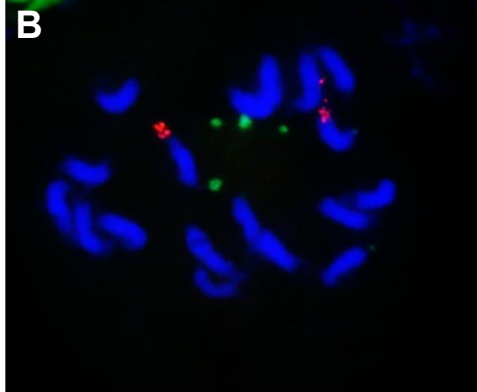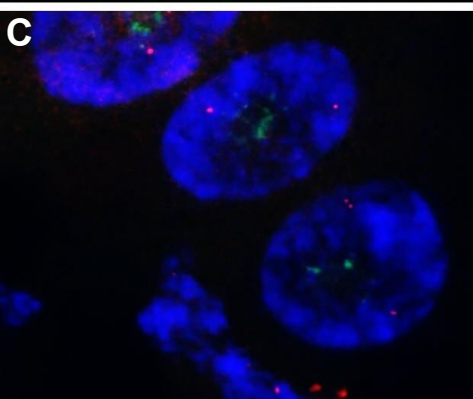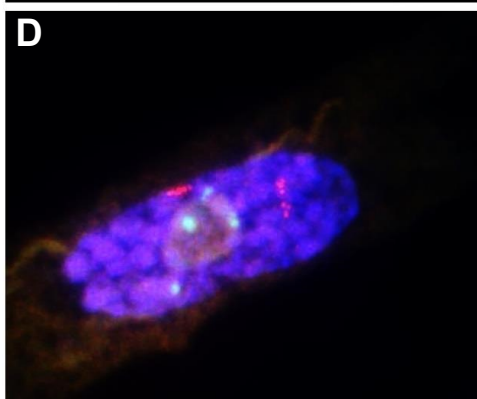

Supplement: supp_pp.114.242826_242826Figure_S1.pdf [file supp_pp.114.242826_242826Figure_S1.pdf]
